# Supplementary material
Source: publisher site journal article supplement (http://kjim.org/upload/media/kjim-2023-276-Supplementary-Table-4.pdf)
Supplement: Supplementary file 1 [file kjim-2023-276-Supplementary-Table-4.pdf]

**Supplementary Table 4. Characteristics of rheumatoid arthritis patients by income and education level**

| Variable                    | Monthly household income (10,000 Won) |              |                | Education     |                |                |
|-----------------------------|---------------------------------------|--------------|----------------|---------------|----------------|----------------|
|                             | ≤ 200                                 | > 200        | <i>p</i> value | Low (< 10 yr) | High (≥ 10 yr) | <i>p</i> value |
| Total                       | 2,425                                 | 2,650        |                | 2,273         | 2,804          |                |
| <b>Demographics</b>         |                                       |              |                |               |                |                |
| Age (yr)                    | 62.8 ± 12.1                           | 62.8 ± 12.4  | 0.939          | 63.0 ± 12.1   | 62.7 ± 12.3    | 0.443          |
| Sex, female                 | 2,050 (84.5)                          | 2,276 (85.9) | 0.188          | 1,918 (84.4)  | 2,409 (85.9)   | 0.136          |
| <b>Socioeconomic status</b> |                                       |              |                |               |                |                |
| <b>Marital status</b>       |                                       |              |                |               |                |                |
| Ever married                | 2,262 (93.3)                          | 2,480 (93.6) | 0.701          | 2,240 (98.5)  | 2,504 (89.3)   | < 0.001        |
| Currently married           | 1,647 (67.9)                          | 2,297 (86.7) | < 0.001        | 1,682 (74.0)  | 2,262 (80.7)   | < 0.001        |
| Number of family members    | 2.5 ± 1.3                             | 3.5 ± 1.1    | < 0.001        | 2.8 ± 1.4     | 3.2 ± 1.2      | < 0.001        |
| Insurance coverage          |                                       |              | < 0.001        |               |                | < 0.001        |
| National health insurance   | 2,172 (89.6)                          | 2,631 (99.3) |                | 2,100 (92.4)  | 2,704 (96.4)   |                |
| Medical aid and others      | 253 (10.4)                            | 19 (0.7)     |                | 173 (7.6)     | 100 (3.6)      |                |
| <b>Comorbidities</b>        |                                       |              |                |               |                |                |
| Heart failure               | 24 (1.0)                              | 2 (0.1)      | < 0.001        | 22 (1.0)      | 4 (0.1)        | < 0.001        |
| HTN                         | 756 (31.2)                            | 506 (19.1)   | < 0.001        | 794 (34.9)    | 469 (16.7)     | < 0.001        |
| Angina or MI                | 58 (2.4)                              | 52 (2.0)     | 0.341          | 57 (2.5)      | 53 (1.9)       | 0.160          |
| Stroke                      | 28 (1.2)                              | 20 (0.8)     | 0.185          | 32 (1.4)      | 16 (0.6)       | 0.004          |
| ILD                         | 29 (1.2)                              | 14 (0.5)     | 0.015          | 22 (1.0)      | 21 (0.7)       | 0.489          |
| Pneumonia                   | 26 (1.1)                              | 24 (0.9)     | 0.647          | 24 (1.1)      | 26 (0.9)       | 0.750          |
| Tuberculosis                | 120 (4.9)                             | 126 (4.8)    | 0.798          | 107 (4.7)     | 139 (5.0)      | 0.729          |
| Asthma                      | 65 (2.7)                              | 46 (1.7)     | 0.028          | 63 (2.8)      | 48 (1.7)       | 0.013          |
| Hepatitis                   | 57 (2.4)                              | 70 (2.6)     | 0.567          | 48 (2.1)      | 79 (2.8)       | 0.131          |
| Peptic ulcer                | 151 (6.2)                             | 125 (4.7)    | 0.021          | 125 (5.5)     | 151 (5.4)      | 0.908          |
| Diabetes                    | 258 (10.6)                            | 156 (5.9)    | < 0.001        | 278 (12.2)    | 137 (4.9)      | < 0.001        |
| Malignancy                  | 185 (7.6)                             | 221 (8.3)    | 0.379          | 182 (8.0)     | 224 (8.0)      | 0.999          |
| Depression                  | 42 (1.7)                              | 45 (1.7)     | 0.999          | 38 (1.7)      | 49 (1.7)       | 0.922          |
| Fracture                    | 503 (20.8)                            | 364 (13.8)   | < 0.001        | 490 (21.6)    | 377 (13.5)     | < 0.001        |
| Osteoporosis                | 246 (10.1)                            | 112 (4.2)    | < 0.001        | 265 (11.7)    | 93 (3.3)       | < 0.001        |

DAS28-ESR, disease activity score 28-joint count erythrocyte sedimentation rate; EQ-5D, EuroQol-5 dimensions; HAQ, health assessment questionnaire; HTN, hypertension; ILD, interstitial lung disease; MI, myocardial infarction; VAS, visual analog scale. Significant *p* value at < 0.05.
